# Supplementary material for: Designing tri-branched multiple-site SO2 capture materials
Source: Royal Society of Chemistry journal article supplement (doi:10.1039/c8cp01285g), 2018-01-01
Supplement: c8cp01285g1.pdf [file c8cp01285g1.pdf]

# Design tri-branched multiple-site SO<sub>2</sub> capture materials

Chenchen Li<sup>a</sup>, Dongmei Lu<sup>b</sup>, and Chao Wu<sup>\*a</sup>

<sup>a</sup>Frontier Institute of Science and Technology, Xi'an Jiaotong University, Xi'an, Shaanxi 710054, China.

<sup>b</sup>Department of Chemistry, School of Science, Xi'an Jiaotong University, Xi'an, Shaanxi 710049, China.

\*[corresponding.chaowu@mail.xjtu.edu.cn](mailto:corresponding.chaowu@mail.xjtu.edu.cn)

# Supporting Information

## Contents

|            |                                                                                                                                                 |    |
|------------|-------------------------------------------------------------------------------------------------------------------------------------------------|----|
| Table S1   | Calculated sequential SO <sub>2</sub> binding energies of reported anions.....                                                                  | 3  |
| Table S2   | Calculated sequential SO <sub>2</sub> binding energies of selected anions.....                                                                  | 4  |
| Table S3   | Detailed simulated capacities of selected anions.....                                                                                           | 4  |
| Figure S1  | Other tri-branched species studied in this work.....                                                                                            | 5  |
| Figure S2  | Configurations of selected anions and their sequential SO <sub>2</sub> absorptions.....                                                         | 5  |
| Figure S3  | Line chart of calculated sequential SO <sub>2</sub> binding energies of the studied anions.....                                                 | 6  |
| Figure S4  | Stacked column plot of calculated sequential SO <sub>2</sub> binding energies of the studied anions.....                                        | 6  |
| Figure S5  | Configurations of the sequential SO <sub>2</sub> absorptions using <b>TIA</b> .....                                                             | 7  |
| Figure S6  | Various stable configurations of <b>TAEA</b> and SO <sub>2</sub> complexes.....                                                                 | 7  |
| Figure S7  | The first binding energy of studied anions and SO <sub>2</sub> versus the NBO orbital energy of the lone pair of the reacting N atom.....       | 9  |
| Figure S8  | The first binding energy of selected anions and SO <sub>2</sub> versus the NBO orbital energy of the lone pair of the reacting N or S atom..... | 9  |
| Figure S9  | Multiple-site interactions in the optimized structures based on <b>Tetz</b> and NO dimers.....                                                  | 10 |
| Figure S10 | Multiple-site interactions in the optimized structures based on <b>TAEA</b> and NO dimers.....                                                  | 10 |
| Reference  | .....                                                                                                                                           | 11 |

TableS1. Calculated sequential SO<sub>2</sub> binding energies (kJ mol<sup>-1</sup>) of reported anions. Sequential SO<sub>2</sub> interacting positions with **Tetz** are labeled by numbers in red.

| E <sub>b</sub>                                                                                                         | 1     | 2     | 3     | 4     | 5     | Ref |
|------------------------------------------------------------------------------------------------------------------------|-------|-------|-------|-------|-------|-----|
| 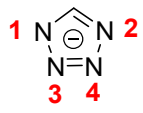<br>Tetz                              | -89.3 | -59.9 | -39.7 | -34.4 | ---   | 1   |
| <br>BenIm                             | -98.2 | -53.7 | -19.6 | ---   | ---   | 2   |
| <br>Phth                              | -68.7 | -42.3 | -39.5 | -34.4 | -30.9 | 3   |
| <br>BTFA                            | -89.4 | -60.6 | -56.9 | -54.7 | ---   | 4   |
| <br>tri(imidazolyl)hydroborate      | -56.9 | -50.7 | -46.5 | ---   | ---   | 5   |
| <br>tri(pyrazolyl)hydroborate       | -63.1 | -56.2 | -52.8 | ---   | ---   | 5   |
| <br>tri(1,2,4-triazolyl)hydroborate | -49.1 | -48.2 | -42.1 | -31.2 | ---   | 5   |
| <br>tri(tetrazolyl)hydroborate      | -37.6 | -36.7 | -34.7 | -24.4 | ---   | 5   |

Table S2. Calculated sequential SO<sub>2</sub> binding energies (kJ mol<sup>-1</sup>) of selected anions. “-n” means the neutral molecule of the anion counterpart shown in Figure 1.

|                |       |         |        |        |       |         |        |          |        |
|----------------|-------|---------|--------|--------|-------|---------|--------|----------|--------|
| E <sub>b</sub> | TAA-n | TAMA-n  | TAEA-n | TAAL-n | TIA-n | TIA-1-n | TIAL-n | TIAL-1-n | TAB-n  |
|                | n     |         |        |        |       |         |        |          |        |
| 1              | -26.5 | -47.2   | -46.8  | -74.7  | -27.6 | -37.5   | -27.3  | -94.5    | -26.2  |
| 2              | -24.3 | -34.2   | -48.3  | -57.7  | -25.9 | -33.2   | -28.2  | -72.2    | -21.5  |
| 3              | -21.3 | -25.7   | -46.3  | -46.0  | -25.0 | -32.7   | -32.9  | -49.4    | -16.7  |
| E <sub>b</sub> | TIB-n | TIB-1-n | TPA    | TPB    | TIA-2 | TIAL-2  | TIB-2  | THMA     | THB    |
| 1              | -27.8 | -36.1   | -27.3  | -32.1  | -25.8 | -25.8   | -27.5  | -148.4   | -104.0 |
| 2              | -27.2 | -36.9   | -28.5  | -26.5  | -24.7 | -24.8   | -26.7  | -60.7    | -67.3  |
| 3              | -27.2 | -35.1   | -25.5  | -14.8  | -23.5 | -24.1   | -26.3  | -43.8    | -28.4  |

Table S3. Detailed simulated capacities of the selected anions.

| Anions                                                                              | Absorption capacity<br>(1 bar of SO <sub>2</sub> , 20°C) | Residual capacity<br>(1 bar of SO <sub>2</sub> , 120°C) | Available capacity |
|-------------------------------------------------------------------------------------|----------------------------------------------------------|---------------------------------------------------------|--------------------|
|  | 3.44                                                     | 1.91                                                    | 1.53               |
|  | 3.59                                                     | 1.04                                                    | 2.55               |
|  | 4.00                                                     | 3.38                                                    | 0.62               |
|  | 6.12                                                     | 4.95                                                    | 1.17               |
|  | 5.96                                                     | 4.10                                                    | 1.86               |

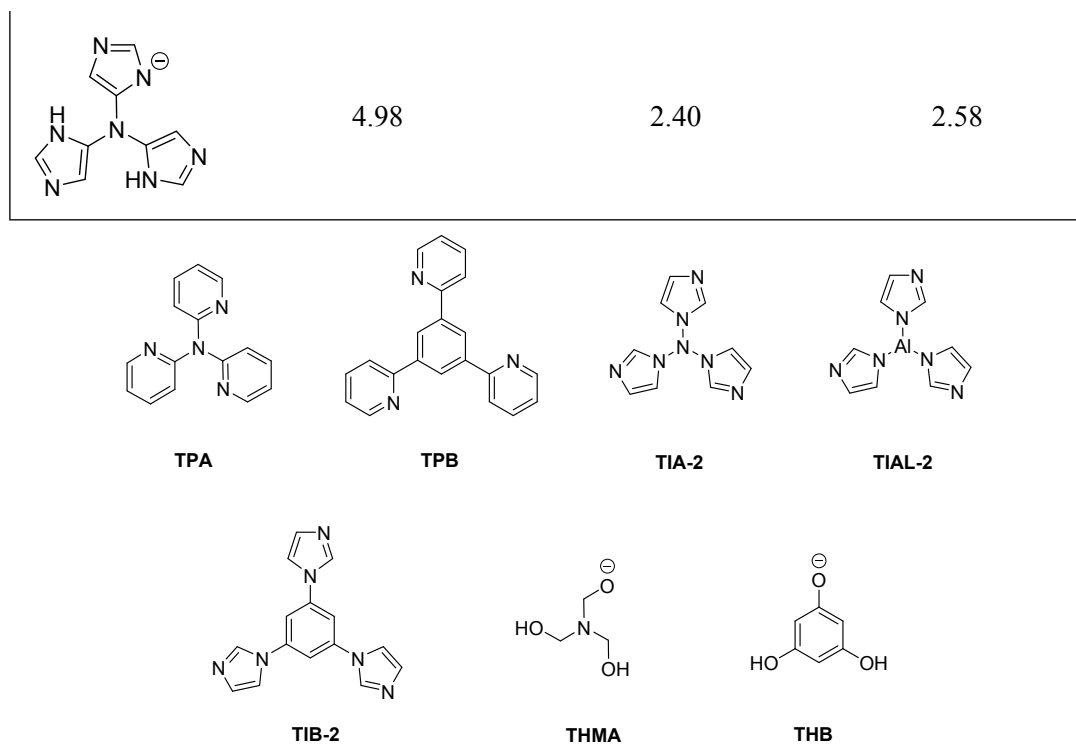

Figure S1. Other tri-branched species (including anion and neutral ones) studied in this work.

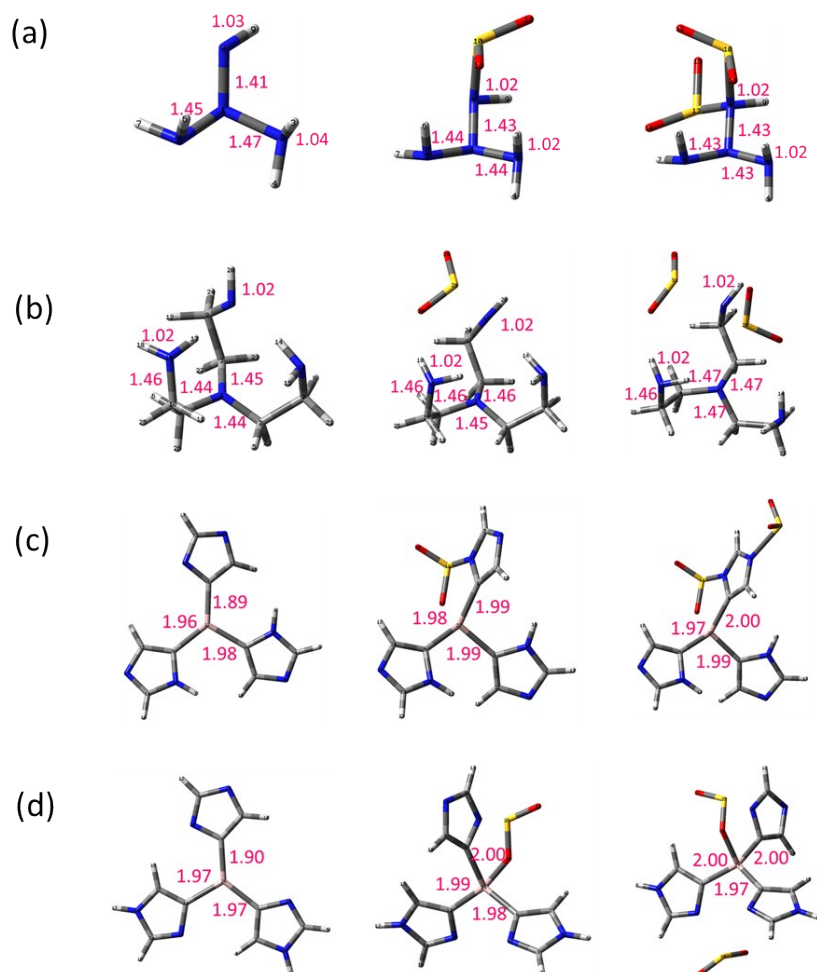

Figure S2. Configurations of (a) **TAA**, (b) **TAEA**, (c) **TIAL** and (d) **TIAL-1** with their sequential SO<sub>2</sub> absorptions. The important bond lengths (Å) are given. Red is oxygen, blue is nitrogen, yellow is sulfur, gray is carbon and white is hydrogen.

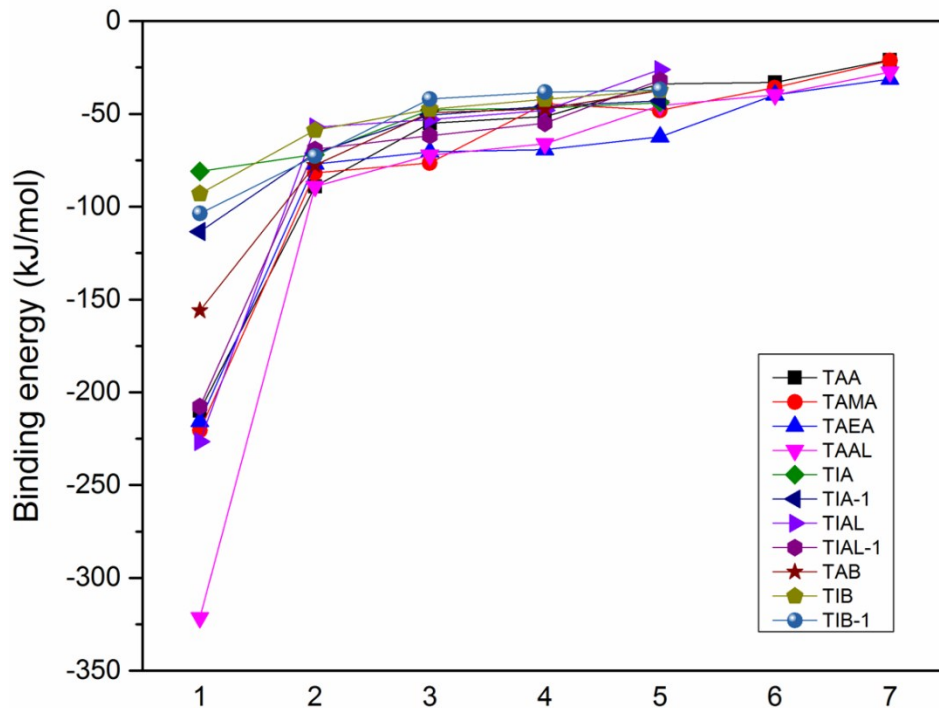

Figure S3. Line chart of calculated sequential  $\text{SO}_2$  binding energies ( $\text{kJ mol}^{-1}$ ) of the studied anions. Consecutive numbers below means the numbers of absorbed  $\text{SO}_2$ .

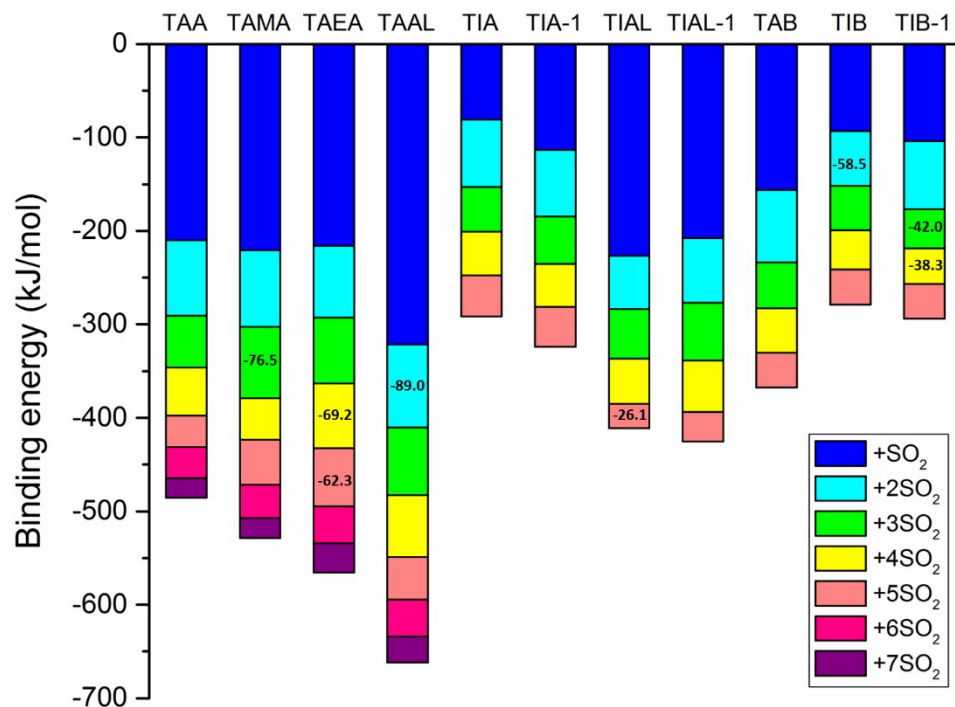

Figure S4. Stacked column plot of calculated sequential  $\text{SO}_2$  binding energies ( $\text{kJ mol}^{-1}$ ) of the studied anions. The minimum and the maximum of each binding are labeled by numbers in black during the second to the fifth  $\text{SO}_2$  attachment.

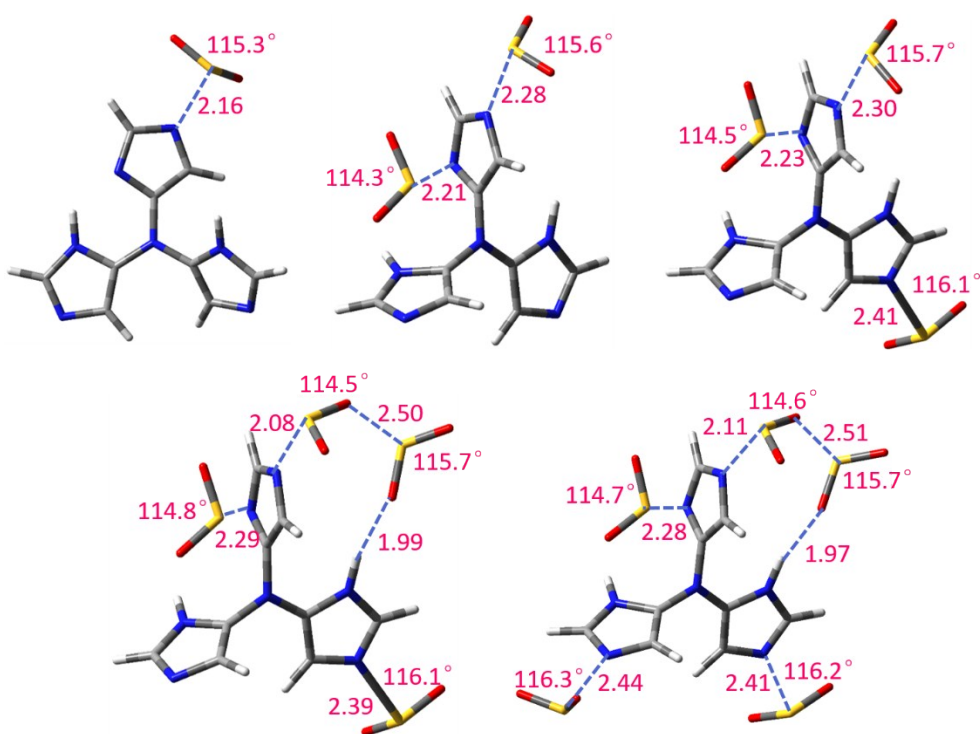

Figure S5. Configurations of the sequential SO<sub>2</sub> absorptions using **TIA**. The distances between N-S (Å) and the angles of ∠OSO are given.

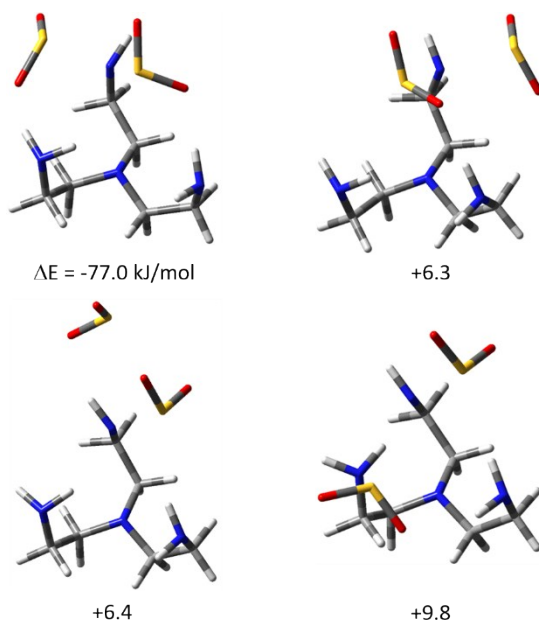



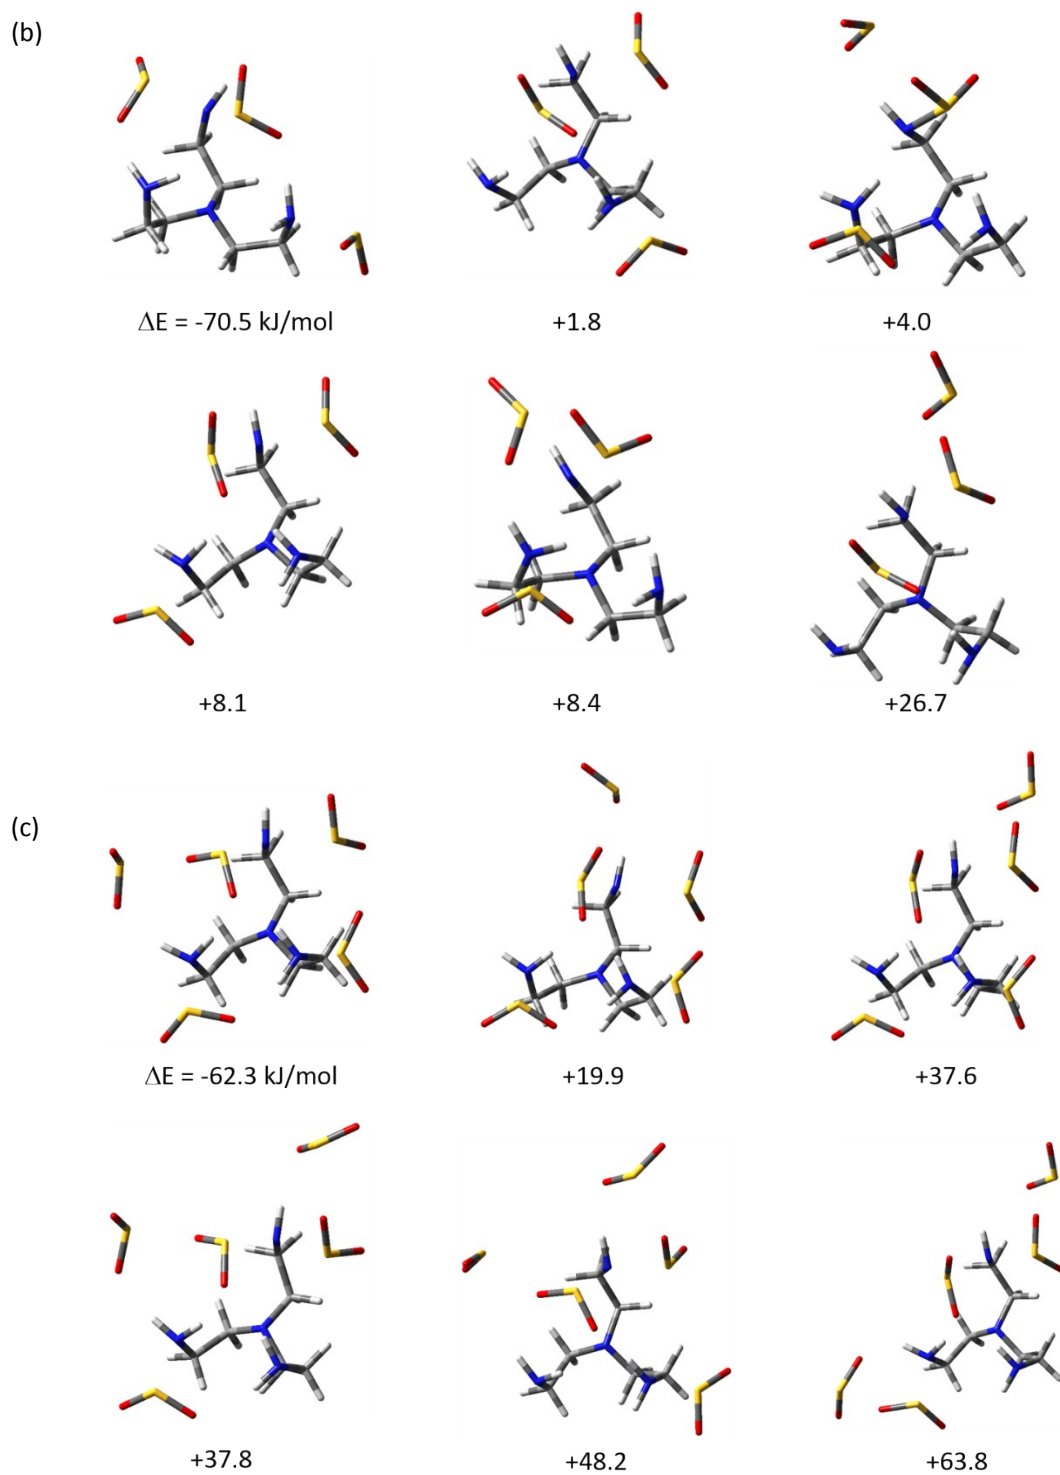

Figure S6. Various stable configurations of (a) TAEA-2SO<sub>2</sub>, (b)TAEA-3SO<sub>2</sub> and (c)TAEA-5SO<sub>2</sub> complexes. The binding energy or the relative binding energy with respect to the most stable one (in kJ mol<sup>-1</sup>) are given below each configuration.



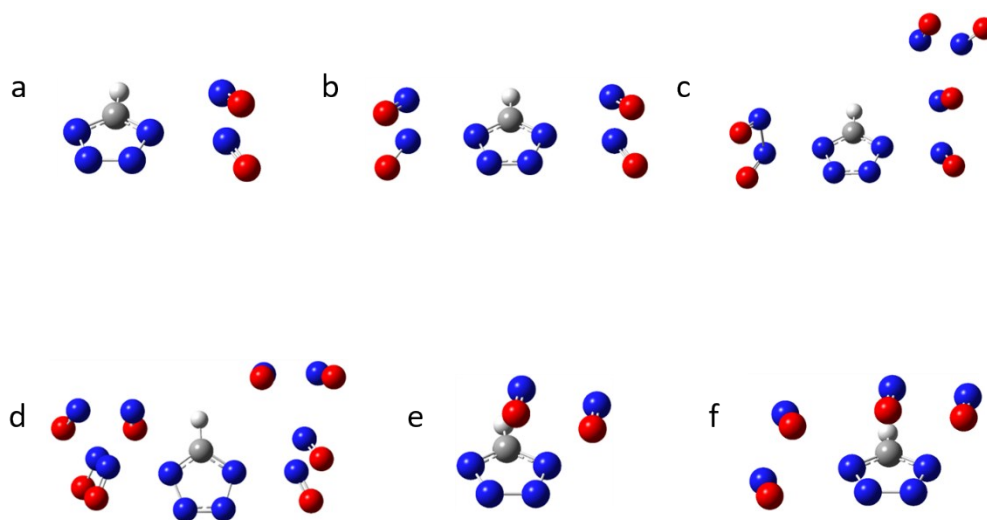

Figure S9. Multiple-site interactions in the optimized structures based on **Tetz** and NO dimers at (a-d) B3LYP/6-311++G(d,p) level and (e-f) MP2/6-31+G(d) level. (a) **Tetz**-NONO,  $\Delta E = -42.9$  kJ mol<sup>-1</sup>; (b) **Tetz**-2NONO,  $\Delta E = -34.2$  kJ mol<sup>-1</sup>; (c) **Tetz**-3NONO,  $\Delta E = -26.5$  kJ mol<sup>-1</sup>; (d) **Tetz**-4NONO,  $\Delta E = -23.4$  kJ mol<sup>-1</sup>; (e) **Tetz**-NONO,  $\Delta E = -47.4$  kJ mol<sup>-1</sup>; (f) **Tetz**-2NONO,  $\Delta E = -45.5$  kJ mol<sup>-1</sup>.

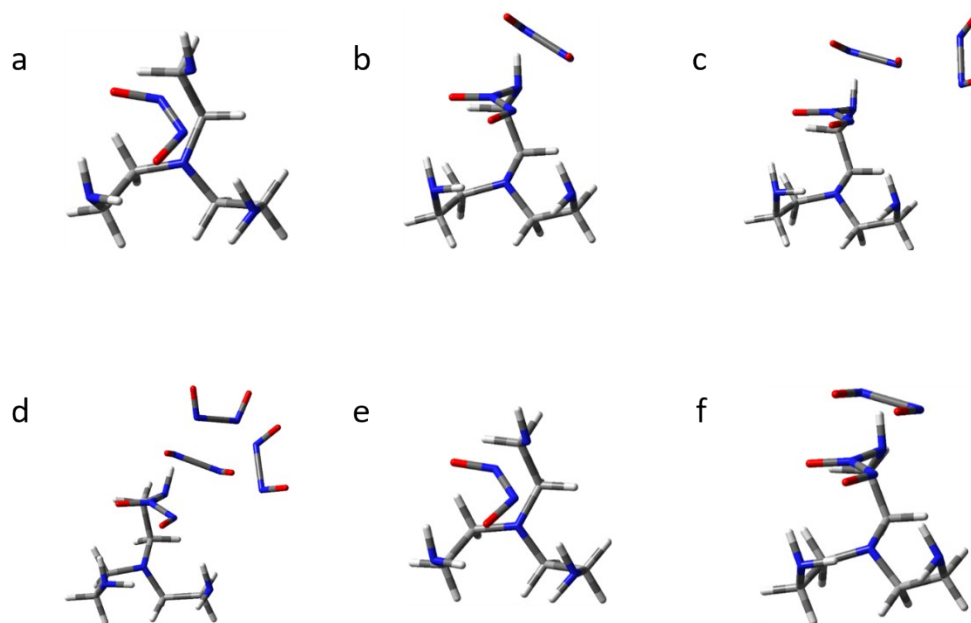

Figure S10. Multiple-site interactions in the optimized structures based on **TAEA** and NO dimer at (a-d) B3LYP/6-311++G(d,p) level and (e-f) MP2/6-31+G(d) level. (a) **TAEA**-NONO,  $\Delta E = -219.0$  kJ mol<sup>-1</sup>; (b) **TAEA**-2NONO,  $\Delta E = -43.5$  kJ mol<sup>-1</sup>; (c) **TAEA**-3NONO,  $\Delta E = -31.8$  kJ mol<sup>-1</sup>; (d) **TAEA**-4NONO,  $\Delta E = -34.9$  kJ mol<sup>-1</sup>; (e) **TAEA**-NONO,  $\Delta E = -226.2$  kJ mol<sup>-1</sup>; (f) **TAEA**-2NONO,  $\Delta E = -69.9$  kJ mol<sup>-1</sup>.

## Reference

1. C. Wang, G. Cui, X. Luo, Y. Xu, H. Li and S. Dai, *J. Am. Chem. Soc.*, 2011, **133**, 11916-11919.
2. G. Cui, W. Lin, F. Ding, X. Luo, X. He, H. Li and C. Wang, *Green Chem.*, 2014, **16**, 1211-1216.
3. G. Cui, F. Zhang, X. Zhou, Y. Huang, X. Xuan and J. Wang, *ACS Sustain. Chem. Eng.*, 2015, **3**, 2264-2270.
4. G. Cui, N. Zhao, Y. Li, H. Wang, Y. Zhao, Z. Li and J. Wang, *ACS Sustain. Chem. Eng.*, 2017, **5**, 7985-7992.
5. H. Tang and D. Lu, *ChemPhysChem*, 2015, **16**, 2854-2860.
